# Supplementary material for: Pathomimetic avatars reveal divergent roles of microenvironment in invasive transition of ductal carcinoma in situ
Source: Springer Nature journal article supplement (doi:10.1186/s13058-017-0847-0), 2017-05-15
Supplement: MOESM4 [file 12289230]

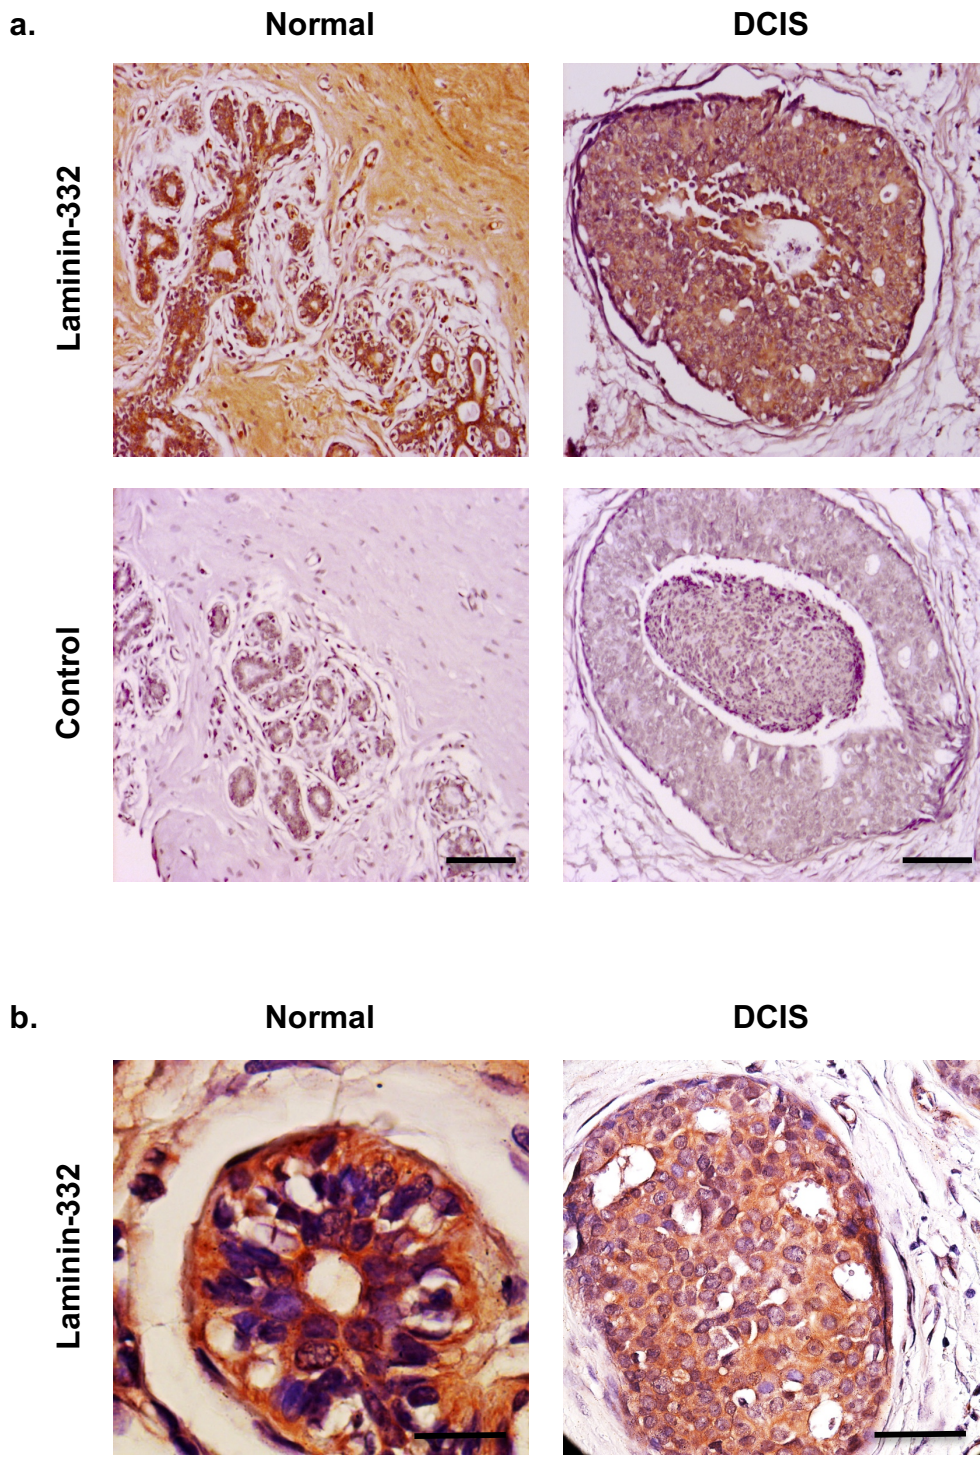

Additional File 4: Figure S2
