# Supplementary material for: Pathomimetic avatars reveal divergent roles of microenvironment in invasive transition of ductal carcinoma in situ
Source: Springer Nature journal article supplement (doi:10.1186/s13058-017-0847-0), 2017-05-15
Supplement: MOESM6 [file 12289230]

**Angled View**

**En Face View**

**8 days**

**8 days**

**21 days**

**DCIS**

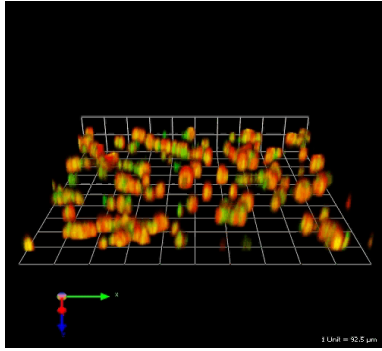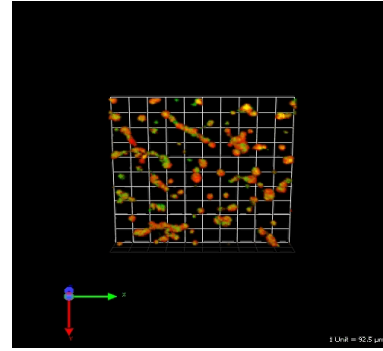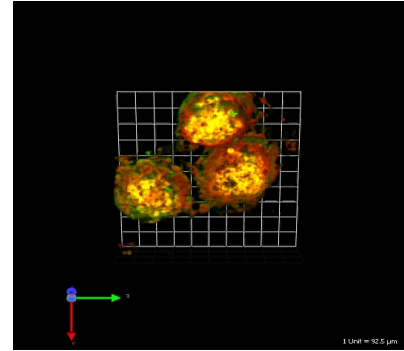

**DCIS  
MEPs**

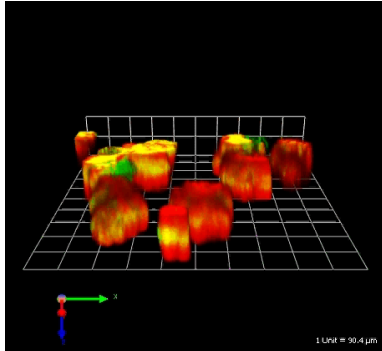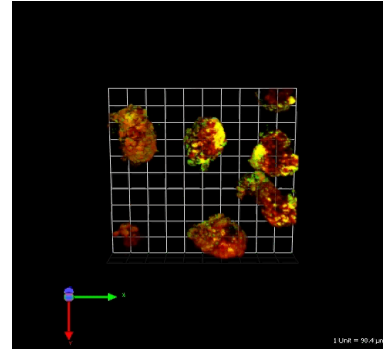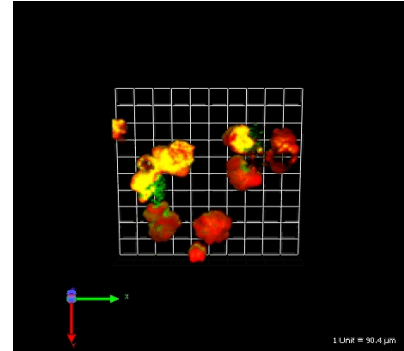

**DCIS  
CAFs**

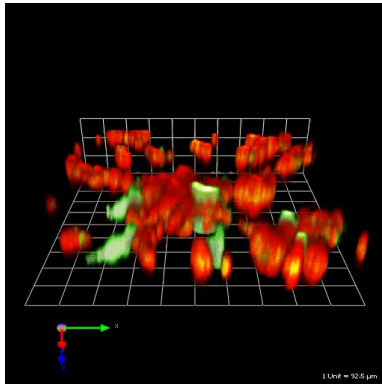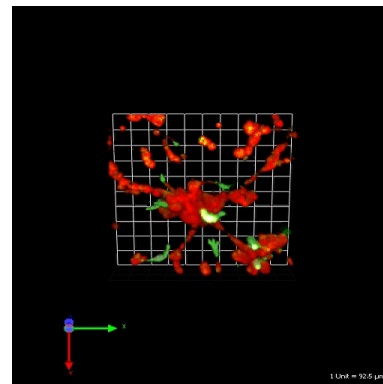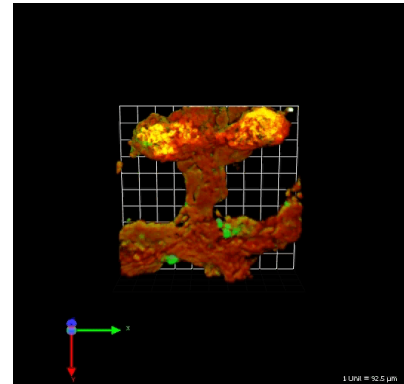

**DCIS  
MEPs  
CAFs**

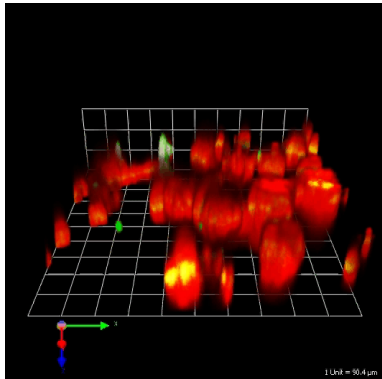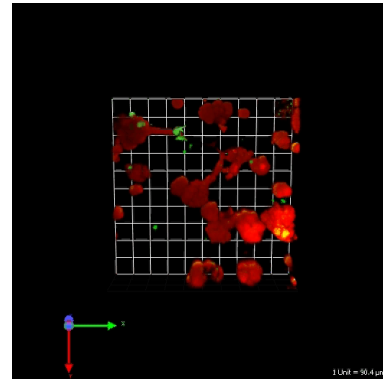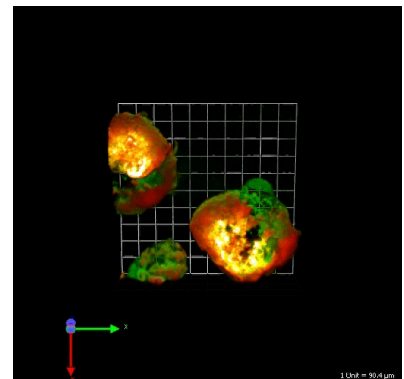

**Additional File 6: Figure S4**
