# Supplementary material for: Pathomimetic avatars reveal divergent roles of microenvironment in invasive transition of ductal carcinoma in situ
Source: Springer Nature journal article supplement (doi:10.1186/s13058-017-0847-0), 2017-05-15
Supplement: MOESM7 [file 12289230]

**DCIS**

**a.**

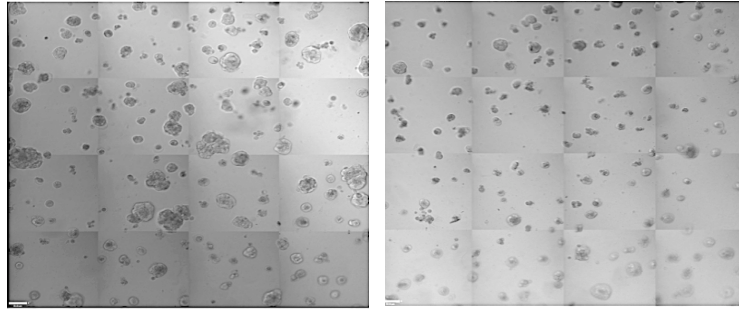

**8 days**

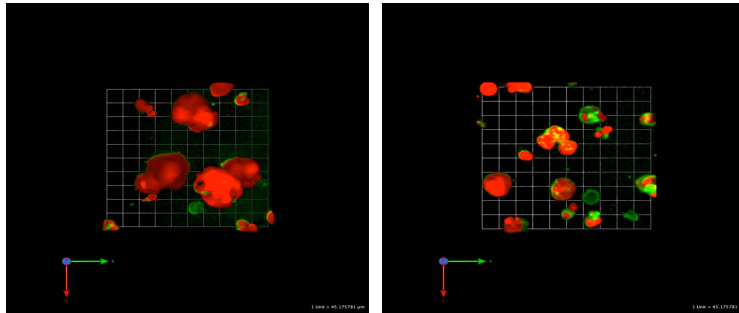

**Control**

**MEP-CM**

**SUM 102**

**b.**

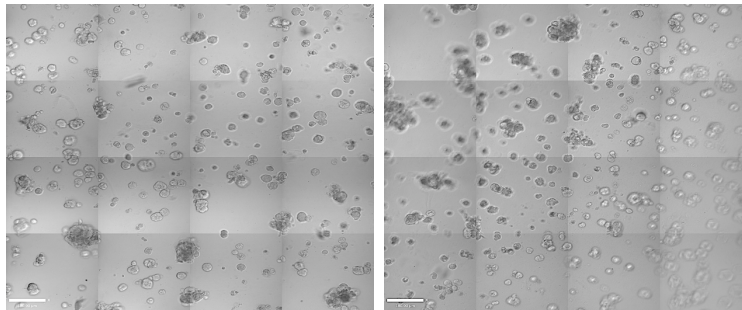

**8 days**

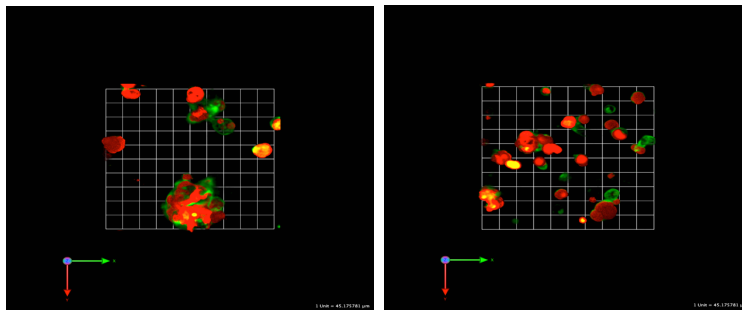

**Control**

**MEP-CM**
