# Supplementary material for: Pathomimetic avatars reveal divergent roles of microenvironment in invasive transition of ductal carcinoma in situ
Source: Springer Nature journal article supplement (doi:10.1186/s13058-017-0847-0), 2017-05-15
Supplement: MOESM11 [file 12289230]

**Additional File 11: Table S1. Comparative Proteomic Analysis of Conditioned Media from 2D and 3D MEP and DCIS Cultures.** Protein scores >28 indicate identity or extensive homology ( $p \leq 0.05$ ). ND, not detected.

| Protein Name                       | Protein Score |             |      |             |
|------------------------------------|---------------|-------------|------|-------------|
|                                    | 2D Cultures   | 3D Cultures |      |             |
|                                    | MEPs          | DCIS        | MEPs | DCIS + MEPs |
| <b>PAI-1</b>                       | 249           | 41          | 77   | 146         |
| <b><math>\alpha</math>-enolase</b> | 159           | ND          | 28   | 99          |
| <b>Fibronectin</b>                 | 155           | ND          | 35   | ND          |
| <b>RabGD1<math>\alpha</math></b>   | 102           | ND          | ND   | ND          |
| <b>Laminin 332</b>                 | 88            | ND          | ND   | 24          |
