# Supplementary material for: Pathomimetic avatars reveal divergent roles of microenvironment in invasive transition of ductal carcinoma in situ
Source: Springer Nature journal article supplement (doi:10.1186/s13058-017-0847-0), 2017-05-15
Supplement: MOESM12 [file 12289230]

**Additional File 12: Table S2. Proteomic Analysis of Conditioned Media from 2D MEP Cultures.**

| Identified Proteins                                   | UniProt Entry name | Molecular Weight | 2D              |      |
|-------------------------------------------------------|--------------------|------------------|-----------------|------|
|                                                       |                    |                  | Media (control) | MEPs |
|                                                       |                    |                  | # of peptides   |      |
| Serum albumin                                         | ALBU_HUMAN         | 69 kDa           | 2               | 4    |
| Keratin, type II cytoskeletal 2 epidermal             | K22E_HUMAN         | 66 kDa           | 4               | 0    |
| Hemoglobin subunit alpha                              | HBA_HUMAN          | 15 kDa           | 2               | 3    |
| Hemoglobin subunit gamma-1                            | HBG1_HUMAN         | 16 kDa           | 1               | 2    |
| Heat shock protein HSP 90-alpha                       | HS90A_HUMAN        | 85 kDa           | 4               | 1    |
| Fibronectin                                           | FINC_HUMAN         | 263 kDa          | 0               | 5    |
| Alpha-enolase                                         | ENOA_HUMAN         | 47 kDa           | 2               | 2    |
| Ubiquitin-60S ribosomal protein L40                   | RL40_HUMAN         | 15 kDa           | 2               | 2    |
| Triosephosphate isomerase                             | TPIS_HUMAN         | 31 kDa           | 1               | 3    |
| Tubulin alpha-1B chain                                | TBA1B_HUMAN        | 50 kDa           | 3               | 1    |
| Plasminogen activator inhibitor 1                     | PAI1_HUMAN         | 45 kDa           | 0               | 4    |
| 14-3-3 protein zeta/delta                             | 1433Z_HUMAN        | 28 kDa           | 1               | 2    |
| Rab GDP dissociation inhibitor alpha                  | GDIA_HUMAN         | 51 kDa           | 1               | 2    |
| Keratin, type II cytoskeletal 1                       | K2C1_HUMAN         | 66 kDa           | 2               | 1    |
| Laminin subunit alpha-3                               | LAMA3_HUMAN        | 37 kDa           | 0               | 3    |
| 14-3-3 protein epsilon                                | 1433E_HUMAN        | 29 kDa           | 1               | 1    |
| Fructose-bisphosphate aldolase C                      | ALDOC_HUMAN        | 39 kDa           | 1               | 1    |
| Chromogranin-A                                        | CMGA_HUMAN         | 51 kDa           | 1               | 1    |
| Elongation factor 1-alpha 1                           | EF1A1_HUMAN        | 50 kDa           | 1               | 1    |
| Filamin-A                                             | FLNA_HUMAN         | 281 kDa          | 1               | 1    |
| 78 kDa glucose-regulated protein                      | GRP78_HUMAN        | 72 kDa           | 1               | 1    |
| Hypoxanthine-guanine phosphoribosyltransferase        | HPRT_HUMAN         | 25 kDa           | 1               | 1    |
| Pyruvate kinase PKM                                   | KPYM_HUMAN         | 58 kDa           | 1               | 1    |
| Putative nucleoside diphosphate kinase                | NDK8_HUMAN         | 16 kDa           | 1               | 1    |
| Phosphatidylethanolamine-binding protein 1            | PEBP1_HUMAN        | 21 kDa           | 1               | 1    |
| Tropomyosin alpha-4 chain                             | TPM4_HUMAN         | 29 kDa           | 1               | 1    |
| Complement C3                                         | CO3_HUMAN          | 187 kDa          | 1               | 1    |
| Creatine kinase B-type                                | KCRB_HUMAN         | 43 kDa           | 2               | 0    |
| Clathrin heavy chain 1                                | CLH1_HUMAN         | 192 kDa          | 2               | 0    |
| Fibrinogen alpha chain                                | FIBA_HUMAN         | 95 kDa           | 1               | 0    |
| Protein strawberry notch homolog 2                    | SBNO2_HUMAN        | 150 kDa          | 1               | 0    |
| ATP synthase subunit alpha, mitochondrial             | ATPA_HUMAN         | 60 kDa           | 1               | 0    |
| Flavin reductase (NADPH)                              | BLVRB_HUMAN        | 22 kDa           | 1               | 0    |
| Dihydropyrimidinase-related protein 2                 | DPYL2_HUMAN        | 62 kDa           | 1               | 0    |
| Rab GDP dissociation inhibitor beta                   | GDIB_HUMAN         | 51 kDa           | 1               | 0    |
| Heterogeneous nuclear ribonucleoprotein K             | HNRPK_HUMAN        | 51 kDa           | 1               | 0    |
| Eukaryotic initiation factor 4A-I                     | IF4A1_HUMAN        | 46 kDa           | 1               | 0    |
| NEDD8                                                 | NEDD8_HUMAN        | 9 kDa            | 1               | 0    |
| POTE ankyrin domain family member E                   | POTEE_HUMAN        | 121 kDa          | 1               | 0    |
| Peptidyl-prolyl cis-trans isomerase A                 | PPIA_HUMAN         | 18 kDa           | 1               | 0    |
| Proteasome subunit alpha type-5                       | PSA5_HUMAN         | 26 kDa           | 1               | 0    |
| Proteasome subunit alpha type-7-like                  | PSA7L_HUMAN        | 29 kDa           | 1               | 0    |
| Ras-related protein Rab-11A                           | RB11A_HUMAN        | 24 kDa           | 1               | 0    |
| Stathmin                                              | STMN1_HUMAN        | 17 kDa           | 1               | 0    |
| Tubulin beta-4A chain                                 | TBB4A_HUMAN        | 50 kDa           | 1               | 0    |
| T-complex protein 1 subunit theta                     | TCPQ_HUMAN         | 60 kDa           | 1               | 0    |
| Transitional endoplasmic reticulum ATPase             | TERA_HUMAN         | 89 kDa           | 1               | 0    |
| Transketolase                                         | TKT_HUMAN          | 68 kDa           | 1               | 0    |
| 14-3-3 protein theta                                  | 1433T_HUMAN        | 28 kDa           | 0               | 1    |
| Cadherin-3                                            | CADH3_HUMAN        | 91 kDa           | 0               | 1    |
| Neutrophil gelatinase-associated lipocalin            | NGAL_HUMAN         | 23 kDa           | 0               | 1    |
| Nucleobindin-1                                        | NUCB1_HUMAN        | 54 kDa           | 0               | 1    |
| Phosphoglucomutase-1                                  | PGM1_HUMAN         | 61 kDa           | 0               | 1    |
| Peroxiredoxin-2                                       | PRDX2_HUMAN        | 22 kDa           | 0               | 1    |
| Tropomyosin alpha-3 chain                             | TPM3_HUMAN         | 33 kDa           | 0               | 1    |
| Apolipoprotein A-I                                    | APOA1_HUMAN        | 31 kDa           | 0               | 1    |
| Transforming growth factor-beta-induced protein ig-h3 | BGH3_HUMAN         | 75 kDa           | 0               | 1    |
| Malate dehydrogenase, cytoplasmic                     | MDHC_HUMAN         | 36 kDa           | 1               | 0    |
| Reticulocalbin-3                                      | RCN3_HUMAN         | 37 kDa           | 1               | 0    |
| Coagulation factor V                                  | FA5_HUMAN          | 252 kDa          | 1               | 0    |
| Transgelin                                            | TAGL_HUMAN         | 23 kDa           | 1               | 0    |
| Catenin alpha-2                                       | CTNA2_HUMAN        | 105 kDa          | 0               | 1    |
| PHD finger protein 7                                  | PHF7_HUMAN         | 44 kDa           | 0               | 1    |
| Protein OSCP1                                         | OSCP1_HUMAN        | 45 kDa           | 1               | 0    |
