# Supplementary material for: Pathomimetic avatars reveal divergent roles of microenvironment in invasive transition of ductal carcinoma in situ
Source: Springer Nature journal article supplement (doi:10.1186/s13058-017-0847-0), 2017-05-15
Supplement: MOESM13 [file 12289230]

**Additional File 13: Table S3. Proteomic Analysis of Conditioned Media from 3D MEP and DCIS Cultures.**

| Identified Proteins                                                  | UniProt Entry name | Molecular Weight (kDa) | 3D Cultures   |      |             |      |       |
|----------------------------------------------------------------------|--------------------|------------------------|---------------|------|-------------|------|-------|
|                                                                      |                    |                        | 3D Media      | MEPs | DCIS + MEPs | DCIS | Media |
|                                                                      |                    |                        | # of peptides |      |             |      |       |
| Vimentin                                                             | VIME_HUMAN         | 54                     | 5             | 8    | 10          | 10   | 0     |
| Hemoglobin subunit alpha                                             | HBA_HUMAN          | 15                     | 2             | 4    | 3           | 3    | 5     |
| Serum albumin                                                        | ALBU_HUMAN         | 69                     | 4             | 3    | 3           | 4    | 5     |
| Heat shock cognate 71 kDa protein                                    | HSP7C_HUMAN        | 71                     | 1             | 3    | 5           | 5    | 1     |
| Plasminogen activator inhibitor 1                                    | PAI1_HUMAN         | 45                     | 0             | 3    | 7           | 1    | 0     |
| Laminin subunit beta-1                                               | LAMB1_HUMAN        | 198                    | 1             | 6    | 4           | 0    | 0     |
| Transgelin                                                           | TAGL_HUMAN         | 23                     | 0             | 4    | 3           | 3    | 1     |
| Myosin-1                                                             | MYH1_HUMAN         | 22                     | 1             | 3    | 6           | 3    | 0     |
| Vasopressin-neurophysin 2-copeptin                                   | NEU2_HUMAN         | 17                     | 2             | 2    | 2           | 3    | 2     |
| Actin, cytoplasmic 1                                                 | ACTB_HUMAN         | 42                     | 0             | 1    | 2           | 4    | 0     |
| Keratin, type I cytoskeletal 10                                      | K1C10_HUMAN        | 59                     | 6             | 0    | 2           | 0    | 0     |
| 14-3-3 protein epsilon                                               | 1433E_HUMAN        | 29                     | 0             | 1    | 3           | 3    | 1     |
| Phosphatidylethanolamine-binding protein 1                           | PEBP1_HUMAN        | 21                     | 1             | 2    | 2           | 1    | 2     |
| Hemoglobin subunit epsilon                                           | HBE_HUMAN          | 16                     | 1             | 2    | 1           | 2    | 1     |
| Cystatin-C                                                           | CYTC_HUMAN         | 16                     | 1             | 1    | 2           | 2    | 0     |
| Triosephosphate isomerase                                            | TPIS_HUMAN         | 31                     | 0             | 1    | 2           | 2    | 2     |
| Ubiquitin-60S ribosomal protein L40                                  | RL40_HUMAN         | 15                     | 0             | 1    | 1           | 1    | 0     |
| Heat shock protein HSP 90-alpha                                      | HS90A_HUMAN        | 85                     | 0             | 1    | 2           | 1    | 0     |
| Elongation factor 1-alpha 1                                          | EF1A1_HUMAN        | 50                     | 1             | 2    | 2           | 1    | 0     |
| Secretogranin-2                                                      | SCG2_HUMAN         | 71                     | 0             | 1    | 1           | 0    | 0     |
| Antileukoproteinase                                                  | SLPI_HUMAN         | 14                     | 1             | 0    | 2           | 2    | 0     |
| Keratin, type II cytoskeletal 1                                      | K2C1_HUMAN         | 66                     | 4             | 1    | 1           | 0    | 0     |
| ATP synthase subunit alpha, mitochondrial                            | ATPA_HUMAN         | 60                     | 0             | 1    | 3           | 2    | 0     |
| Calmodulin                                                           | CALM_HUMAN         | 17                     | 0             | 0    | 1           | 2    | 1     |
| Alpha-actinin-1                                                      | ACTN1_HUMAN        | 103                    | 0             | 1    | 1           | 0    | 0     |
| Peroxidasin homolog                                                  | PXDN_HUMAN         | 165                    | 0             | 0    | 2           | 1    | 0     |
| Peroxiredoxin-1                                                      | PRDX1_HUMAN        | 22                     | 0             | 1    | 2           | 1    | 0     |
| Metalloproteinase inhibitor 1                                        | TIMP1_HUMAN        | 23                     | 0             | 0    | 2           | 3    | 0     |
| Transforming growth factor-beta-induced protein ig-h3                | BGH3_HUMAN         | 75                     | 0             | 0    | 2           | 1    | 0     |
| Prothymosin alpha                                                    | PTMA_HUMAN         | 12                     | 0             | 1    | 0           | 1    | 1     |
| Nidogen-1                                                            | NID1_HUMAN         | 136                    | 2             | 1    | 1           | 1    | 0     |
| Protein DJ-1                                                         | PARK7_HUMAN        | 20                     | 0             | 1    | 1           | 2    | 1     |
| Tropomyosin beta chain                                               | TPM2_HUMAN         | 33                     | 1             | 1    | 2           | 1    | 0     |
| 40S ribosomal protein S3                                             | RS3_HUMAN          | 27                     | 0             | 1    | 2           | 2    | 0     |
| Thrombospondin-1                                                     | TSP1_HUMAN         | 129                    | 0             | 1    | 2           | 2    | 0     |
| 78 kDa glucose-regulated protein                                     | GRP78_HUMAN        | 72                     | 0             | 1    | 2           | 1    | 0     |
| Basement membrane-specific heparan sulfate proteoglycan core protein | PGBM_HUMAN         | 469                    | 0             | 1    | 1           | 1    | 0     |
| Heterogeneous nuclear ribonucleoprotein K                            | HNRPK_HUMAN        | 51                     | 0             | 1    | 1           | 1    | 0     |
| SPARC                                                                | SPRC_HUMAN         | 35                     | 0             | 1    | 1           | 1    | 0     |
| Alpha-enolase                                                        | ENOA_HUMAN         | 47                     | 0             | 1    | 2           | 1    | 0     |
| Myosin regulatory light chain 12A                                    | ML12A_HUMAN        | 20                     | 0             | 0    | 1           | 2    | 0     |
| Elafin                                                               | ELAF_HUMAN         | 12                     | 0             | 0    | 2           | 1    | 0     |
| Laminin subunit gamma-1                                              | LAMC1_HUMAN        | 178                    | 1             | 0    | 3           | 0    | 0     |
| Lamin-B1                                                             | LMNB1_HUMAN        | 66                     | 0             | 1    | 2           | 0    | 0     |
| Myosin-9                                                             | MYH9_HUMAN         | 227                    | 0             | 0    | 1           | 1    | 0     |
| Protein FAM149B1                                                     | F149B_HUMAN        | 65                     | 1             | 1    | 0           | 0    | 1     |
| Transmembrane protein 79                                             | TMM79_HUMAN        | 44                     | 0             | 0    | 0           | 0    | 1     |
| Macrophage migration inhibitory factor                               | MIF_HUMAN          | 12                     | 0             | 0    | 1           | 1    | 0     |
| Thioredoxin                                                          | THIO_HUMAN         | 12                     | 0             | 0    | 1           | 1    | 0     |
| Alpha-2-HS-glycoprotein                                              | FETUA_HUMAN        | 39                     | 0             | 2    | 1           | 0    | 0     |
| Prelamin-A/C                                                         | LMNA_HUMAN         | 74                     | 0             | 0    | 2           | 0    | 0     |
| Ubiquitin carboxyl-terminal hydrolase isozyme L1                     | UCHL1_HUMAN        | 25                     | 0             | 0    | 1           | 0    | 1     |
