# Supplementary material for: Pathomimetic avatars reveal divergent roles of microenvironment in invasive transition of ductal carcinoma in situ
Source: Springer Nature journal article supplement (doi:10.1186/s13058-017-0847-0), 2017-05-15

## SUM102 + CAFs

Isotype Control

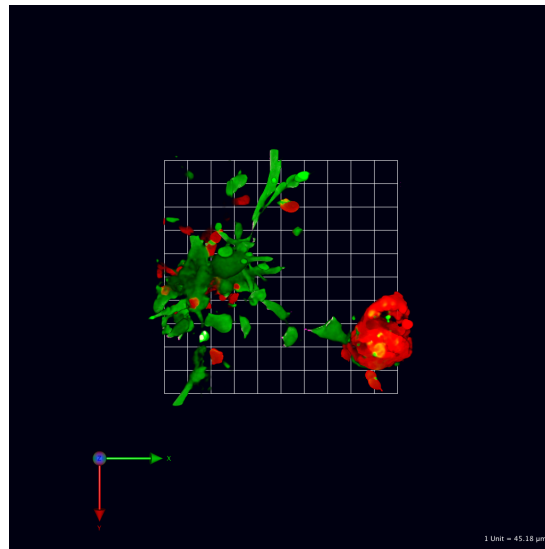

IL-6nAb

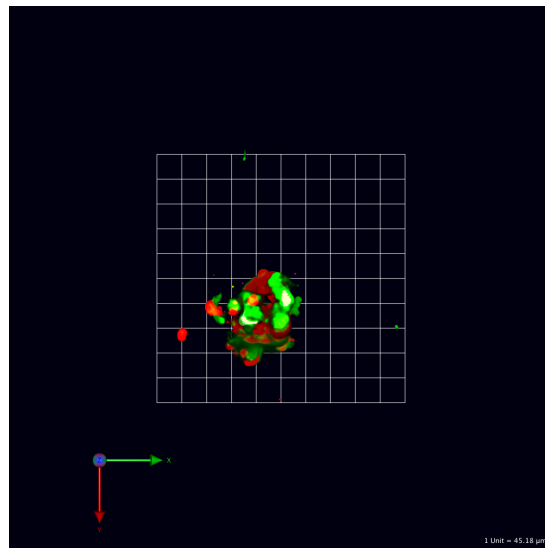

Supplement: MOESM14 [file 12289230]
